# Supplementary material
Source: publisher site journal article supplement (https://www.dovepress.com/article/487047)
Supplement: Supplementary file 1 [file get_supplementary_file.php]

| **Supplemental Table 1. ICD-9 Codes** |  |
| --- | --- |
| Condition | ICD-9-CM Codes |
| Diabetic Retinopathy | 362.01, 362.03, 362.04, 362.05, 362.06, 362.10, 362.02 |
| Diabetic Macular Edema | 362.07, 362.83 |
| Diabetic Eye Disease | All of the above in addition to 361.81, 362.16, 362.81, 362.84 |

**Supplemental Table 2. Multivariate Cox Regression of Baseline Predictors for Diagnosis of Diabetic Macular Edema**

| Variables | HR | 95% Confidence Interval |
| --- | --- | --- |
| Age, 10-year increments | 0.953 | (0.755 - 1.202) |
| Male Sex | 1.321 | (0.320 - 5.457) |
| Ethnicity |  |  |
| Caucasian | - | - |
| African American | 0.790 | (0.438 - 1.426) |
| Latino/Hispanic | 1.644* | (0.934 - 2.893) |
| Other | 3.243* | (0.968 - 10.870) |
| Unknown/Refused to Report | 0.407* | (0.189 - 0.879) |
| HbA1c |  |  |
| below 6.0 | - | - |
| 6.0 - 7.0 | 1.279 | (0.427 - 3.832) |
| 7.0 - 8.5 | 1.140 | (0.385 - 3.377) |
| above 8.5 | 2.417 | (0.818 - 7.144) |
| Systolic Blood Pressure, mmHg |  |  |
| over 140mmHg | 1.995*** | (1.291 - 3.082) |
| Microalbumin, mg |  |  |
| over 5mg | 1.831** | (1.085 - 3.090) |
| Blood Urea Nitrogen, mg/dL |  |  |
| below 20 mg/dL | - | - |
| 20 - 35 mg/dL | 1.585* | (0.978 - 2.569) |
| over 35 mg/dL | 0.862 | (0.254 - 2.925) |
| Cholesterol, mg/dL (mean, std) |  |  |
| over 240 mg/dL | 1.225 | (0.633 - 2.370) |
| Diabetes Medications |  |  |
| Metformin | 0.922 | (0.588 - 1.446) |
| Rosiglitazone | 0.845 | (0.459 - 1.557) |
| Glipizide | 1.697** | (1.052 - 2.738) |
| Glyburide | 1.165 | (0.732 - 1.852) |
| Insulin | 2.484*** | (1.532 - 4.028) |
| Duration from Diabetes Diagnosis to Visit (per year, time-dependent variable) | 1.010 | (0.871 - 1.170) |
| * p<0.1 |  |  |
| ** p<0.05 |  |  |
| *** p<0.01 |  |  |

| **Supplemental Table 3. Sensitivity Analysis - Multivariate Cox Regression for Diagnosis of Diabetic Eye Disease (excluding those with a diagnosis of diabetic retinopathy and/or diabetic macular edema at initial eye clinic visit)** | | |
| --- | --- | --- |
| Variables | HR | 95% Confidence Interval |
| Age, 10-year increments | 1.106 | (1.011 - 1.208) |
| Male Sex | 0.741 | (0.471 - 1.167) |
| Ethnicity |  |  |
| Caucasian | - | - |
| African American | 1.247* | (0.992 - 1.567) |
| Latino/Hispanic | 1.939*** | (1.532 - 2.455) |
| Other | 1.542 | (0.759 - 3.132) |
| Unknown/Refused to Report | 0.786** | (0.620 - 0.996) |
| HbA1c |  |  |
| below 6.0 | - | - |
| 6.0 - 7.0 | 1.120 | (0.753 - 1.667) |
| 7.0 - 8.5 | 1.584** | (1.076 - 2.332) |
| above 8.5 | 2.467*** | (1.656 - 3.676) |
| Systolic Blood Pressure, mmHg |  |  |
| over 140mmHg | 1.534*** | (1.300 - 1.811) |
| Microalbumin, mg |  |  |
| over 5mg | 1.408*** | (1.110 - 1.785) |
| Blood Urea Nitrogen, mg/dL |  |  |
| below 20 mg/dL | - | - |
| 20 - 35 mg/dL | 1.350*** | (1.107 - 1.645) |
| over 35 mg/dL | 2.367*** | (1.628 - 3.442) |
| Cholesterol, mg/dL (mean, std) |  |  |
| over 240 mg/dL | 1.074 | (0.809 - 1.425) |
| Diabetes Medications |  |  |
| Metformin | 1.025 | (0.862 - 1.219) |
| Rosiglitazone | 0.830 | (0.643 - 1.072) |
| Glipizide | 0.975 | (0.793 - 1.198) |
| Glyburide | 1.029 | (0.857 - 1.234) |
| Insulin | 2.089*** | (1.730 - 2.523) |
| Duration from Diabetes Diagnosis to Visit (per year, time-dependent variable) | 1.035 | (0.980 - 1.092) |
| * p<0.1 |  |  |
| ** p<0.05 |  |  |
| *** p<0.01 |  |  |

| **Supplemental Table 4. Sensitivity Analysis - Multivariate Cox Regression for Diagnosis of Diabetic Retinopathy (excluding those with a diagnosis of diabetic retinopathy at initial eye clinic visit)** | | |
| --- | --- | --- |
| Variables | HR | 95% Confidence Interval |
| Age, 10-year increments | 1.107 | (1.012 - 1.212) |
| Male Sex | 0.753 | (0.473 - 1.200) |
| Ethnicity |  |  |
| Caucasian | - | - |
| African American | 1.221* | (0.968 - 1.541) |
| Latino/Hispanic | 1.963*** | (1.548 - 2.489) |
| Other | 1.373 | (0.645 - 2.924) |
| Unknown/Refused to Report | 0.764** | (0.600 - 0.973) |
| HbA1c |  |  |
| below 6.0 | - | - |
| 6.0 - 7.0 | 1.155 | (0.761 - 1.752) |
| 7.0 - 8.5 | 1.707*** | (1.140 - 2.557) |
| above 8.5 | 2.690*** | (1.775 - 4.076) |
| Systolic Blood Pressure, mmHg |  |  |
| over 140mmHg | 1.586*** | (1.340 - 1.877) |
| Microalbumin, mg |  |  |
| over 5mg | 1.483*** | (1.171 - 1.877) |
| Blood Urea Nitrogen, mg/dL |  |  |
| below 20 mg/dL | - | - |
| 20 - 35 mg/dL | 1.361*** | (1.114 - 1.664) |
| over 35 mg/dL | 2.480*** | (1.710 - 3.596) |
| Cholesterol, mg/dL (mean, std) |  |  |
| over 240 mg/dL | 1.017 | (0.761 - 1.360) |
| Diabetes Medications |  |  |
| Metformin | 1.017 | (0.853 - 1.213) |
| Rosiglitazone | 0.829 | (0.641 - 1.073) |
| Glipizide | 0.952 | (0.772 - 1.175) |
| Glyburide | 1.049 | (0.872 - 1.263) |
| Insulin | 2.162*** | (1.787 - 2.616) |
| Duration from Diabetes Diagnosis to Visit (per year, time-dependent variable) | 1.036 | (0.981 - 1.094) |
| * p<0.1 |  |  |
| ** p<0.05 |  |  |
| *** p<0.01 |  |  |

| **Supplemental Table 5. Sensitivity Analysis - Multivariate Cox Regression for Diagnosis of Macular Edema (excluding those with a diagnosis of macular edema at initial eye clinic visit)** | | |
| --- | --- | --- |
| Variables | HR | 95% Confidence Interval |
| Age, 10-year increments | 0.995 | (0.784 - 1.262) |
| Male Sex | 1.249 | (0.302 - 5.173) |
| Ethnicity |  |  |
| Caucasian | - | - |
| African American | 0.882 | (0.484 - 1.608) |
| Latino/Hispanic | 1.713* | (0.956 - 3.069) |
| Other | 3.570* | (1.067 - 11.941) |
| Unknown/Refused to Report | 0.440* | (0.203 - 0.956) |
| HbA1c |  |  |
| below 6.0 | - | - |
| 6.0 - 7.0 | 1.131 | (0.372 - 3.439) |
| 7.0 - 8.5 | 1.116 | (0.375 - 3.319) |
| above 8.5 | 2.487 | (0.838 - 7.380) |
| Systolic Blood Pressure, mmHg |  |  |
| over 140mmHg | 1.800*** | (1.155 - 2.807) |
| Microalbumin, mg |  |  |
| over 5mg | 1.804** | (1.054 - 3.087) |
| Blood Urea Nitrogen, mg/dL |  |  |
| below 20 mg/dL | - | - |
| 20 - 35 mg/dL | 1.617* | (0.989 - 2.644) |
| over 35 mg/dL | 0.635 | (0.147 - 2.746) |
| Cholesterol, mg/dL (mean, std) |  |  |
| over 240 mg/dL | 1.143 | (0.574 - 2.275) |
| Diabetes Medications |  |  |
| Metformin | 0.954 | (0.601 - 1.514) |
| Rosiglitazone | 0.914 | (0.494 - 1.688) |
| Glipizide | 1.517 | (0.922 - 2.498) |
| Glyburide | 1.191 | (0.741 - 1.913) |
| Insulin | 2.288*** | (1.395 - 3.753) |
| Duration from Diabetes Diagnosis to Visit (per year, time-dependent variable) | 1.022 | (0.880 - 1.186) |
| * p<0.1 |  |  |
| ** p<0.05 |  |  |
| *** p<0.01 |  |  |
